# Supplementary material for: Assessment of 16S rRNA Gene-Based Phylogenetic Diversity of Archaeal Communities in Halite-Crystal Salts Processed from Natural Saharan Saline Systems of Southern Tunisia
Source: MDPI journal article supplement (doi:10.3390/biology10050397), 2021-05-04
Supplement: s1 [file s1]

# Assessment of 16S rRNA Gene-based Phylogenetic Diversity of Archaeal Communities in Halite-crystals Salts Processed from Natural Saharan Saline Systems of Southern Tunisia

Afef Najjari<sup>1</sup>, Panagiota Stathopoulou<sup>2</sup>, khaled Elmnasri<sup>3</sup>, Faten Hasnaoui<sup>1</sup>, Ines Zidi<sup>1</sup>, Haitham Sghaier<sup>3,4</sup>, Hadda I Ouzari<sup>1</sup>, Ameer Cherif<sup>3</sup> and George Tsiamis<sup>2</sup>

<sup>1</sup>Université Tunis El Manar, Faculté des Sciences de Tunis, LR03ES03 Laboratoire de Microbiologie et Biomolécules Actives, 2092, Tunis, Tunisia

<sup>2</sup>Laboratory of Systems Microbiology and Applied Genomics, Department of Environmental Engineering, University of Patras, 2 Seferi Str., 30100 Agrinio, Greece

<sup>3</sup>Univ. Manouba, ISBST, LR11-ES31 BVBGR, Biotechpole Sidi Thabet, 2020, Ariana, Tunisia.

<sup>4</sup>Laboratory "Energy and Matter for Development of Nuclear Sciences" (LR16CNSTN02), National Center for Nuclear Sciences and Technology (CNSTN)

Correspondence: Afef Najjari, Université Tunis El Manar, Faculté des Sciences de Tunis, LR03ES03 Laboratoire de Microbiologie et Biomolécules Actives, 2092, Tunis, Tunisie. email: afef.najjari@fst.utm.tn \*

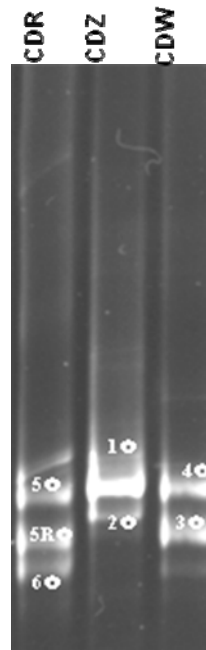

**Figure S1.** Archaeal DGGE patterns of 16S rDNA gene sequences of the V3 variable regions' (567 bp) obtained from different salt samples. Lane1: CDR; lane2: CDW; lane3: CDZ. Bands marked with a numbered asterisk were excised from gel, re-amplified and sequenced. The gradient of the urea and formamide ranged from 20% to 55%.

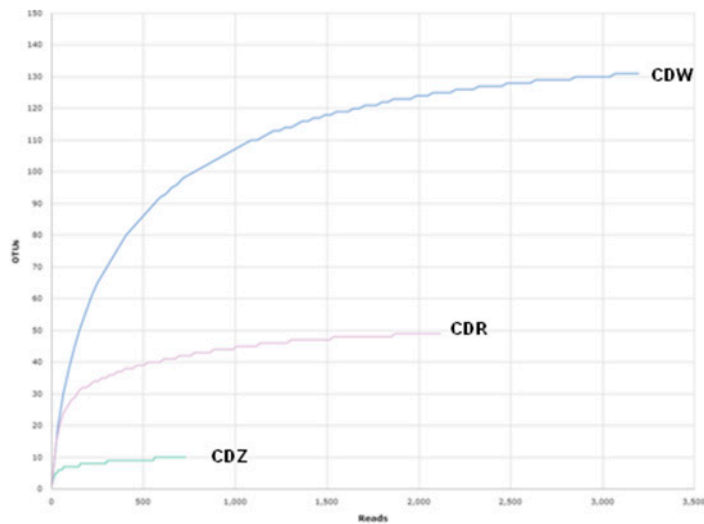

**Figure S2:** Genus-level rarefaction curves of CDZ, CDR and CDW sample based on the 16S rDNA sequences analyzed.

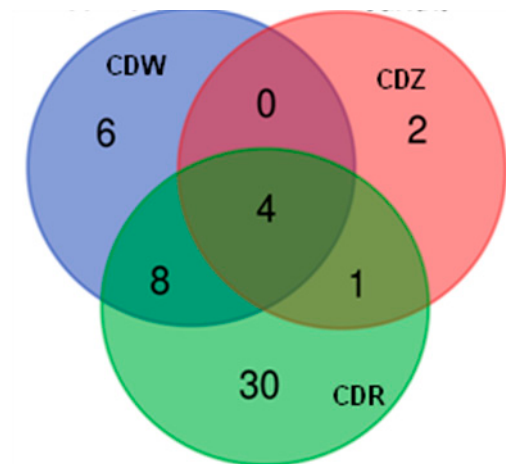

**Figure 3.** Venn diagrams showing the unique and shared OTUs (3% distance level) identified based on cultured, 16S rRNA libraries, DGGE and metataxonomic approaches, for CDR, CDW and CDZ respectively.

**Table S1:** Unique and shared genera between CDW, CDR and CDZ samples based on cultured, 16S rRNA libraries , DGGE and metataxonomic approaches

| Samples     | Total | Genera                                                                                                                                                                                                                                                                                                                                                                                                                                                                                                                                                                                                                                                                                                                                                                      |
|-------------|-------|-----------------------------------------------------------------------------------------------------------------------------------------------------------------------------------------------------------------------------------------------------------------------------------------------------------------------------------------------------------------------------------------------------------------------------------------------------------------------------------------------------------------------------------------------------------------------------------------------------------------------------------------------------------------------------------------------------------------------------------------------------------------------------|
| CDR/CDW/CDZ | 4     | <i>Halorhabdus</i> , <i>Halorubrum</i> , <i>Haloarcula</i> , unclassified <i>Halobacteriaceae</i>                                                                                                                                                                                                                                                                                                                                                                                                                                                                                                                                                                                                                                                                           |
| CDW/CDZ     | 8     | <i>Halonotius</i> , <i>Halorussus</i> , <i>Halovenus</i> , <i>Haloplanus</i> , Uncultured haloarchaeon (JN714452), unclassified <i>Haloferacaceae</i> , Uncultured haloarchaeon (EU869371), <i>Halobellus</i>                                                                                                                                                                                                                                                                                                                                                                                                                                                                                                                                                               |
| CDZ/CDZ     | 1     | <i>Halogeometricum</i>                                                                                                                                                                                                                                                                                                                                                                                                                                                                                                                                                                                                                                                                                                                                                      |
| CDW         | 6     | <i>Halobonum</i> , uncultured euryarchaeote (FN391256), <i>Haladaptatus</i> , <i>Haloquadratum</i> , Unclassified in higher taxonomic rank, <i>Halosimplex</i>                                                                                                                                                                                                                                                                                                                                                                                                                                                                                                                                                                                                              |
| CDZ         | 2     | <i>Haloferax</i> , unclassified <i>Halobacteriaceae</i>                                                                                                                                                                                                                                                                                                                                                                                                                                                                                                                                                                                                                                                                                                                     |
| CDR         | 30    | uncultured <i>Natronomonas</i> (FN391194), <i>Halomarina</i> , <i>Haloparvum</i> , <i>Halolamina</i> , Uncultured haloarchaeon (EU869371), <i>Halobacterium</i> , <i>Halopenitus</i> , <i>Halomicrobium</i> , <i>Salinirussus</i> , <i>Halostella</i> , <i>Natronoarchaeum</i> , <i>Halorientalis</i> , uncultured archaeon (EU722671), <i>Haloredivivus</i> , <i>Haloarchaeobius</i> , <i>Saliphagus</i> , <i>Halovivax</i> , <i>Halorubellus</i> , <i>Salinarchaeum</i> , <i>Halapricum</i> , <i>Halohasta</i> , <i>Halobaculum</i> , uncultured archaeon (KI543180), <i>Natrinema</i> , Uncultured haloarchaeon (FN391274), <i>Halomicroarcula</i> , <i>Natronomonas</i> , <i>Haloterrigena</i> , unclassified <i>Natrialbaceae</i> , Uncultured haloarchaeon (EF533953) |

**Tables S2:** List of shared and unique genera identified in CDW sample based on both cultured and uncultured-dependant approaches

| Approches                                         | Total | Shared and unique genera                                                                                                                                                                                                                                                                                                                                                            |
|---------------------------------------------------|-------|-------------------------------------------------------------------------------------------------------------------------------------------------------------------------------------------------------------------------------------------------------------------------------------------------------------------------------------------------------------------------------------|
| 16S rRNA libraries/Cultured /DGGE /Miseq analysis | 2     | <i>Halorubrum</i> , <i>Haloarcula</i>                                                                                                                                                                                                                                                                                                                                               |
| 16S rRNA libraries/ Miseq analysis                | 1     | <i>Haloquadratum</i>                                                                                                                                                                                                                                                                                                                                                                |
| 16S rRNA libraries                                | 2     | Unclassified <i>Halobacteriaceae</i> , <i>Halonotius</i>                                                                                                                                                                                                                                                                                                                            |
| Cultured                                          | 3     | Strain ZA20911, <i>Haloferax</i> , Strain LDS1                                                                                                                                                                                                                                                                                                                                      |
| DGGE                                              | 1     | unclassified <i>Halobacteriaceae</i>                                                                                                                                                                                                                                                                                                                                                |
| Miseq analysis                                    | 14    | <i>Halobonum</i> <i>Haloplanus</i> <i>Halovenus</i> Unclassified phylum <i>Halorhabdus</i> unclassified <i>halobacteriaceae</i> (EU869371) <i>Haladaptatus</i> unclassified <i>halobacteriaceae</i> (JN714452) unclassified <i>halobacteriaceae</i> (FN391256) <i>Haloferacaceae_uc</i> unclassified <i>Halobacteriaceae</i> <i>Halorussus</i> <i>Halosimplex</i> <i>Halobellus</i> |

**Tables S3:** List of shared and unique genera identified in CDR sample based on both cultured and uncultured-dependant approaches

| Approches                                    | Total | Shared and unique genera                                                                                                                                                                                                                                                                                                                                                                                                                                                                                                                                                                                                                                                                                                                                                                                                                                                                                                                                                                                                                                            |
|----------------------------------------------|-------|---------------------------------------------------------------------------------------------------------------------------------------------------------------------------------------------------------------------------------------------------------------------------------------------------------------------------------------------------------------------------------------------------------------------------------------------------------------------------------------------------------------------------------------------------------------------------------------------------------------------------------------------------------------------------------------------------------------------------------------------------------------------------------------------------------------------------------------------------------------------------------------------------------------------------------------------------------------------------------------------------------------------------------------------------------------------|
| 16S rRNA libraries/Cultured / Miseq analysis | 1     | <i>Halorubrum</i>                                                                                                                                                                                                                                                                                                                                                                                                                                                                                                                                                                                                                                                                                                                                                                                                                                                                                                                                                                                                                                                   |
| / DGGE / Miseq analysis                      | 1     | <i>Natronomonas</i>                                                                                                                                                                                                                                                                                                                                                                                                                                                                                                                                                                                                                                                                                                                                                                                                                                                                                                                                                                                                                                                 |
| Cultured                                     | 2     | Strain 209ZB09 (FN391189), unclassified_ <i>Halobacteriaceae</i>                                                                                                                                                                                                                                                                                                                                                                                                                                                                                                                                                                                                                                                                                                                                                                                                                                                                                                                                                                                                    |
| DGGE                                         | 1     | unclassified_ <i>Halobacteriaceae</i> (LC205717)                                                                                                                                                                                                                                                                                                                                                                                                                                                                                                                                                                                                                                                                                                                                                                                                                                                                                                                                                                                                                    |
| Miseq analysis                               | 40    | <i>Halomarina</i> , <i>Haloparvm</i> , <i>Halolamina</i> , <i>Halobacterium</i> , <i>Unclassified Halobacteriaceae</i> (EF533953) , <i>Halorhabdus</i> , <i>Halonotius</i> , <i>Halopenitus</i> , <i>Halomicrobium</i> , <i>Salinirussus</i> , <i>Halostella</i> , <i>Natronoarchaeum</i> <i>Halorientalis</i> <i>Unclassified Natrionalbaceae</i> <i>Haloredivivus</i> <i>Halogeometricum</i> <i>Halorussus</i> <i>Haloarchaeobius</i> <i>Unclassified Halobacteriaceae</i> <i>Unclassified Haloferacaceae</i> (K1543180) <i>Saliphagus</i> <i>Halovivax</i> <i>Unclassified Haloferacaceae</i> (JN714452) <i>Halorubellus</i> <i>Unclassified Nanosalina</i> (FN391274) <i>Unclassified Nanosalina</i> (EU869371) <i>Halovenus</i> <i>Haloplanus</i> <i>Halapricum</i> <i>Salinarchaeum</i> <i>Halohasta</i> <i>Unclassified Haloferacaceae</i> <i>Halobaculum</i> <i>Natrinema</i> <i>Halomicroarcula</i> <i>Unclassified Halobacteriaceae</i> (EU722671) <i>Unclassified Haloferacaceae</i> (FN391194) <i>Haloterrigena</i> <i>Haloarcula</i> <i>Halobellus</i> |

**Table S4:** List of shared and unique genera identified in CDZ sample based on both cultured and uncultured-dependant approaches

| Approches                                          | Total | Shared and unique genera                                                                                                            |
|----------------------------------------------------|-------|-------------------------------------------------------------------------------------------------------------------------------------|
| 16S rRNA libraries/Cultured /DGGE / Miseq analysis | 1     | <i>Halorubrum</i>                                                                                                                   |
| 16S rRNA libraries /Cultured/ Miseq analysis       | 1     | <i>Haloarcula</i>                                                                                                                   |
| Cultured/ Miseq analysis                           | 1     | <i>Halogeometricum</i>                                                                                                              |
| 16S rRNA libraries                                 | 4     | <i>Halonotius</i> , <i>Halolamina</i> , <i>Haloquadratum</i> , <i>Halorubellus</i>                                                  |
| Cultured                                           | 2     | Strain SFH1A041, Strain ntu 13                                                                                                      |
| Miseq analysis                                     | 5     | <i>Haloferax</i> , <i>Halobacteriaceae_uc</i> , <i>Halorhabdus</i> , <i>Haloarcula</i> , <i>Halogeometricum</i> , <i>Halorubrum</i> |
